# Supplementary material for: Tumor-TME Bipartite Landscape of PD-1/PD-L1 in Endometrial Cancers
Source: MDPI journal article supplement (doi:10.3390/ijms241311079), 2023-07-04
Supplement: s1 [file s1]

**Supplementary Table S1:** Pathological Parameters of Tumor Tissues from Patients with Endometrial Cancers

| Tumor Tissue            |                                  | Pathological Parameters |       |                          |         |
|-------------------------|----------------------------------|-------------------------|-------|--------------------------|---------|
| De-identified Patient # | Histology                        | FIGO Grade              | Stage | Myo-metrial Invasion (%) | LVI     |
| A99                     | Endometrioid adenocarcinoma      | 3                       | IB    | 95                       | Absent  |
| A101                    | Endometrioid adenocarcinoma      | 2                       | I     | 11                       | Absent  |
| A102                    | Endometrioid adenocarcinoma      | 1                       | IA    | 29                       | Absent  |
| A103                    | Endometrioid adenocarcinoma      | 3                       | IA    | 43                       | Absent  |
| A104                    | Endometrioid adenocarcinoma      | 1                       | IA    | 34                       | Present |
| A107                    | Endometrioid adenocarcinoma      | 1                       | IA    | 34                       | Absent  |
| A108                    | Endometrioid adenocarcinoma      | 1                       | IA    | 13                       | Absent  |
| A111                    | Endometrioid adenocarcinoma      | 3                       | IA    | 37                       | Absent  |
| A112                    | Endometrioid adenocarcinoma      | 1                       | IA    | 35                       | Absent  |
| A114                    | Endometrioid adenocarcinoma      | 3                       | IB    | 90                       | Absent  |
| A115                    | Endometrioid adenocarcinoma      | 2                       | IA    | 15                       | Absent  |
| A116                    | Endometrioid adenocarcinoma      | 2                       | IA    | 32                       | Absent  |
| A117                    | Endometrioid adenocarcinoma      | 2                       | IA    | 8                        | Absent  |
| A118                    | High-grade serous adenocarcinoma | 3                       | IIIC2 | 46                       | Present |

|      |                                                                                                                  |   |       |    |         |
|------|------------------------------------------------------------------------------------------------------------------|---|-------|----|---------|
| A119 | Endometrial carcinoma,<br>NOS                                                                                    | 1 | IA    | 0  | Absent  |
| A124 | Endometrioid<br>adenocarcinoma                                                                                   | 1 | IA    | 38 | Absent  |
| A125 | Endometrioid<br>adenocarcinoma,<br>noninvasive                                                                   | 1 | IA    | 0  | Absent  |
| A129 | High-grade serous<br>adenocarcinoma                                                                              | 3 | IIIC2 | 87 | Present |
| A131 | Endometrial cancer                                                                                               | 1 | IVB   | 0  | Present |
| A134 | Endometrioid endometrial<br>adenocarcinoma                                                                       | 2 | IA    | 6  | Absent  |
| A135 | Mixed cell carcinoma,<br>high-grade (90% high-<br>grade serous carcinoma,<br>10% endometrioid<br>adenocarcinoma) | 3 | IA    | 38 | Absent  |
| A138 | Endometrioid carcinoma                                                                                           | 1 | IB    | 64 | Absent  |
| A140 | Endometrioid carcinoma                                                                                           | 1 | IA    | 35 | Absent  |
| A142 | Endometrioid<br>adenocarcinoma                                                                                   | 2 | IA    | 10 | Absent  |
| A145 | Endometrioid<br>adenocarcinoma                                                                                   | 2 | I     | 25 | Absent  |
| A147 | Carcinosarcoma<br>(predominantly<br>endometrioid<br>adenocarcinoma FIGO<br>grade III)                            | 3 | IA    | 48 | Present |

**Supplementary Table S2:** MMR status of PD-L1+ tumor cells (by IHC) versus PD-L1+ TCAFs in patients with endometrial cancers

| FFPE<br>Tumor-<br>IHC | PD-L1+<br>Patient ID | Primary<br>Culture | MMR Status     | Detailed MMR Status |          |        |          |
|-----------------------|----------------------|--------------------|----------------|---------------------|----------|--------|----------|
|                       |                      | TCAF-ICC           |                | MLH1                | MSH2     | MSH6   | PMS2     |
| PD-L1+                | EA99-1               | <1%                | MMR-proficient | Normal              | Normal   | Normal | Normal   |
| PD-L1+                | EA101-2              | PD-L1+             | dMMR           | Normal              | Normal   | Normal | Abnormal |
| PD-L1+                | EA102-3              | <1%                | MMR-proficient | Normal              | Normal   | Normal | Normal   |
| PD-L1+                | EA103-4              | <1%                | MMR-proficient | Normal              | Normal   | Normal | Normal   |
| PD-L1+                | EA104-5              | <1%                | MMR-proficient | Normal              | Normal   | Normal | Normal   |
| PD-L1+                | EA107-6              | PD-L1+             | MMR-proficient | Normal              | Normal   | Normal | Normal   |
| PD-L1+                | EA108-7              | PD-L1+             | dMMR           | Abnormal            | Normal   | Normal | Abnormal |
| Not<br>Done           | EA111-8              | PD-L1+             | MMR-proficient | Normal              | Normal   | Normal | Normal   |
| PD-L1+                | EA115-9              | PD-L1+             | dMMR           | Abnormal            | Normal   | Normal | Abnormal |
| PD-L1+                | EA116-10             | PD-L1+             | MMR-proficient | Normal              | Normal   | Normal | Normal   |
| PD-L1+                | EA118-11             | Not Done           | MMR-proficient | Normal              | Normal   | Normal | Normal   |
| PD-L1+                | EA119-12             | Not Done           | MMR-proficient | Normal              | Normal   | Normal | Normal   |
| PD-L1+                | EA124-13             | PD-L1+             | MMR-proficient | Normal              | Normal   | Normal | Normal   |
| PD-L1+                | EA129-14             | PD-L1+             | MMR-proficient | Normal              | Normal   | Normal | Normal   |
| PD-L1+                | EA134-15             | PD-L1+             | dMMR           | Abnormal            | Normal   | Normal | Abnormal |
| Not<br>Done           | EA138-16             | PD-L1+             | dMMR           | Normal              | Normal   | Normal | Abnormal |
| Not<br>Done           | EA142-17             | PD-L1+             | dMMR           | Abnormal            | Normal   | Normal | Abnormal |
| PD-L1+                | EA145-18             | PD-L1+             | dMMR           | Normal              | Normal   | Normal | Abnormal |
| PD-L1+                | EA147-19             | PD-L1+             | dMMR           | Abnormal            | Abnormal | Normal | Abnormal |
